# Supplementary material for: Imaging Sub-Cellular Methionine and Insulin Interplay in Triple Negative Breast Cancer Lipid Droplet Metabolism
Source: PubMed Central journal article supplement (PMC8960266; doi:10.3389/fonc.2022.858017), 2022-03-10
Supplement: DataSheet_1.pdf [file DataSheet_1.pdf]

# **Imaging Methionine and Insulin Interplay in Lipid Droplet Metabolism in Breast Cancer Cells**

Anthony A. Fung, Khang Hoang, Honghao Zha, Derek Chen, Wenxu Zhang, Lingyan Shi\*

\*Corresponding author. Email: [Lingyanshi@ucsd.edu](mailto:Lingyanshi@ucsd.edu)

## **This PDF file includes:**

Figs. S1 to S4  
Tables S1

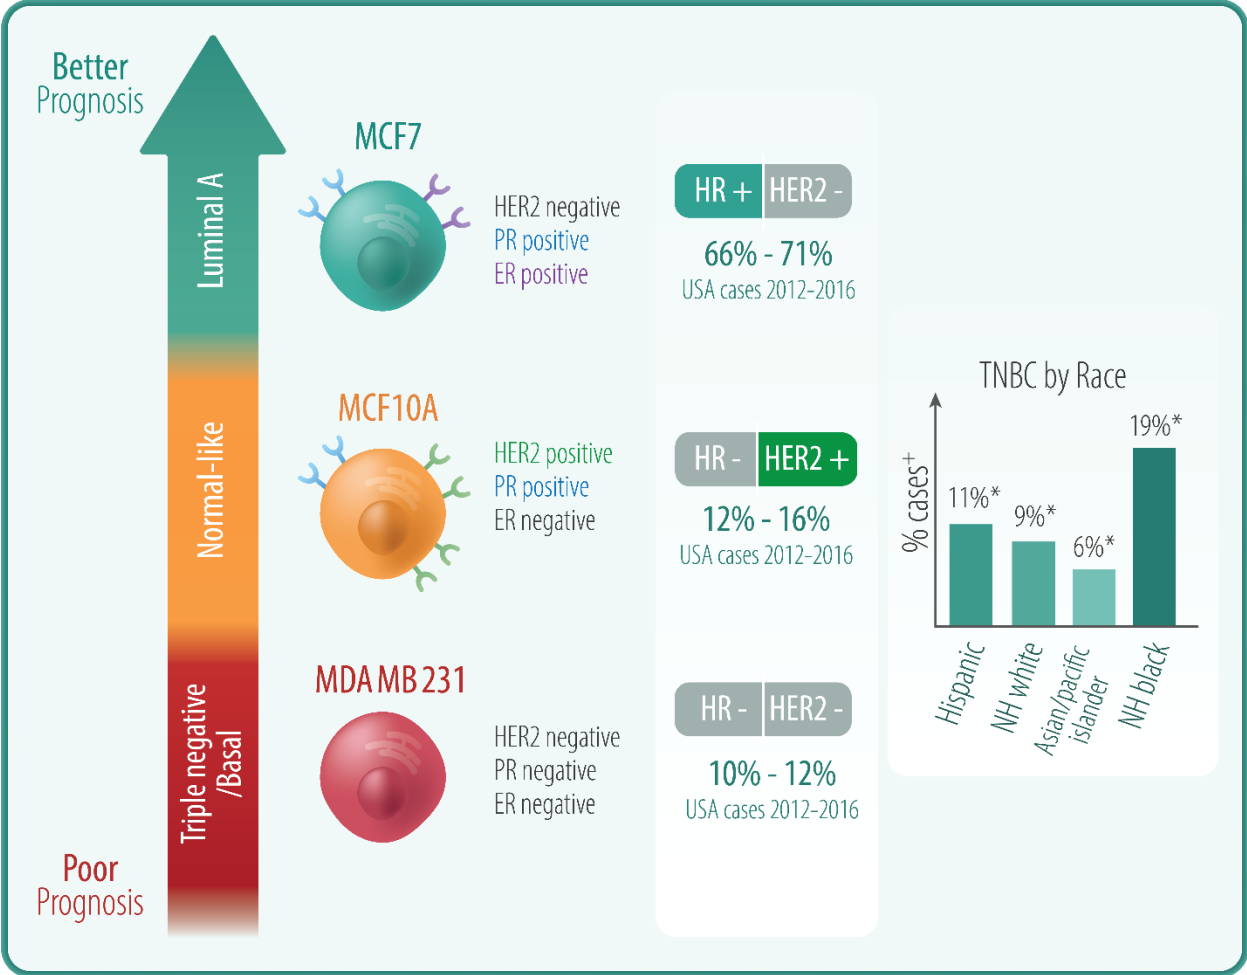

Figure S1. Breast cancer prognosis may be heavily influenced by subtype. Subtypes may be classified by membrane proteins that afford hormone sensitivity but may be further delineated by other aspects of the proteome and metabolic phenotype. TNBC affects non-Hispanic black women more frequently than any other race, but the exact reasons for this discriminatory behavior are not currently known.

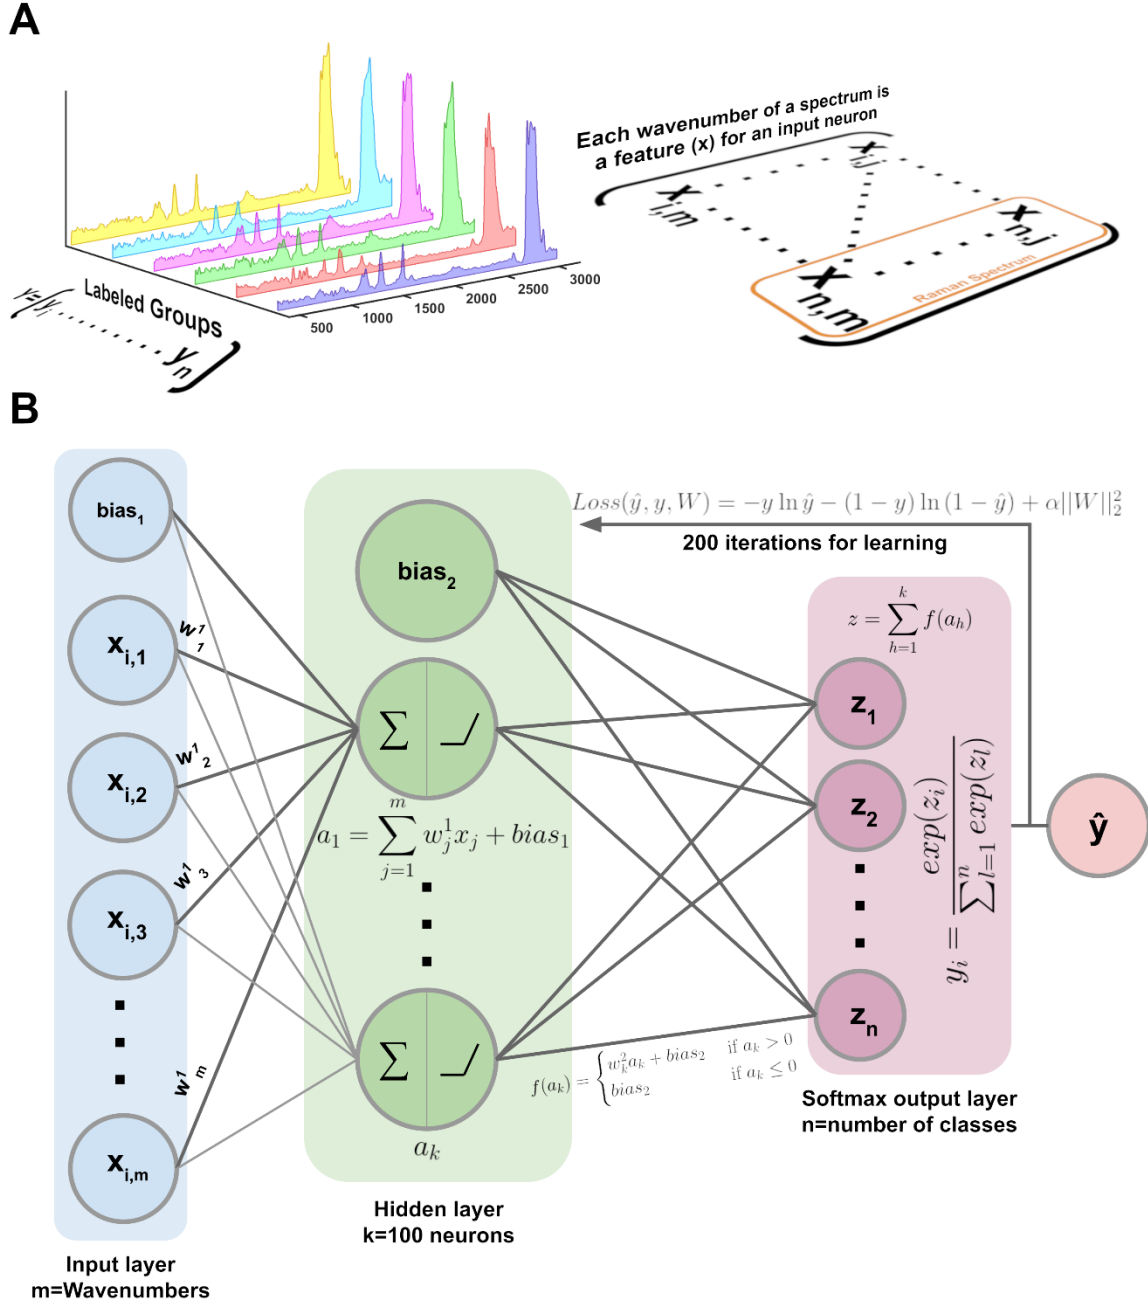

Figure S2. (A) Input for the MLP neural network classification model. All  $n$  spectra are labeled as strings which are stored in target vector  $Y$  with  $n$  categorical variables. All spectra contain the same number of features, so that the final input matrix has size  $n \times m$  corresponding to number of spectra, and wavenumber variables, respectively. (B) MLP model for multiclass prediction of breast cancer subtypes and metabolic phenotypes. Raman intensities are sent to the input layer, multiplied by a weight vector of the same size as wavenumbers, and summed in each hidden layer neuron. A ReLU activation function determines what value is sent to the output layer, where the hidden layer neuron outputs are summed for each class. Softmax calculates the predicted target class  $\hat{y}$  based on the which  $z$  corresponds to the highest probability. The model learns by minimizing cross-entropy loss in which the gradient  $W^{i+1} = W^i - \epsilon \nabla Loss_W^i$ .

Raman spectra from  $450\text{cm}^{-1}$  to  $3150\text{cm}^{-1}$  share very similar patterns with previous studies aimed at high throughput single cell analysis of lipid droplets, with the more aggressive triple negative subtype having a relatively weaker lipid presence<sup>17</sup>. These spectra were then fed into a simple

ReLU neural network for classification. The results demonstrate that Raman spectroscopy of lipid droplets achieved a label-free classification accuracy of 82% with 200 iterations in a 10-fold cross validation shown in Figure 6. Of note is the poorer distinction between the MDA-MB-231 cells that were supplied excess methionine (denoted by “high Met”) and those that were not. This indicates that TNBC may potentially be less demanding of methionine or less responsive to it.

**Confusion Matrix**

Confusion matrix for Neural Network (showing number of instances)

|        |                       | Predicted    |                       |            |                     |          |                   | Σ  |
|--------|-----------------------|--------------|-----------------------|------------|---------------------|----------|-------------------|----|
|        |                       | MBMDA231 D2O | MBMDA231 D2O high Met | MCF10A D2O | MCF10A D2O high Met | MCF7 D2O | MCF7 D2O high Met |    |
| Actual | MBMDA231 D2O          | 10           | 1                     | 0          | 0                   | 0        | 0                 | 11 |
|        | MBMDA231 D2O high Met | 4            | 4                     | 0          | 0                   | 0        | 0                 | 8  |
|        | MCF10A D2O            | 0            | 0                     | 5          | 1                   | 0        | 1                 | 7  |
|        | MCF10A D2O high Met   | 0            | 0                     | 1          | 5                   | 0        | 1                 | 7  |
|        | MCF7 D2O              | 0            | 0                     | 0          | 0                   | 9        | 0                 | 9  |
|        | MCF7 D2O high Met     | 0            | 0                     | 0          | 0                   | 0        | 8                 | 8  |
| Σ      |                       | 14           | 5                     | 6          | 6                   | 9        | 10                | 50 |

Figure S3. Confusion matrix illustrating the 10-fold cross validation accuracy of the ReLU neural network. 100 neurons in the hidden layer and 200 iterations with the Adam solver achieved AUC: 0.9811, CA: 0.82, F1: 0.812, Precision: 0.823, Recall: 0.82. Classification between dietary methionine concentrations in TNBC cell line MDA-MB-231 was the poorest.

Table S1. 2-way ANOVA of figure 4B shows significant interaction term Insulin\*Methionine in TNBC.

**ANOVA MDA-MB-231 CH<sub>2</sub>:CH<sub>3</sub>**

|                           | Sum Sq.  | d.f. | Mean Sq.  | F       | Prob>F        |
|---------------------------|----------|------|-----------|---------|---------------|
| <b>Insulin</b>            | 0.023695 | 2    | 0.011848  | 2.841   | 0.0741        |
| <b>Methionine</b>         | 0.084655 | 1    | 0.084655  | 20.2999 | <b>0.0001</b> |
| <b>Insulin*Methionine</b> | 0.034647 | 2    | 0.017324  | 4.1541  | <b>0.0256</b> |
| <b>Error</b>              | 0.12511  | 30   | 0.0041702 |         |               |
| <b>Total</b>              | 0.2681   | 35   |           |         |               |

Table S2. 2-way ANOVA of figure 5A-B. Relative lipid metabolism characterized by the ratio of de novo synthesized and total lipids was not significantly sensitive to methionine concentration in normal-like breast cells, while there is a significant interaction term Insulin\*Methionine in TNBC. In both cell types, methionine concentration was the significant independent variable in terms of relative lipid and protein synthesis.

**A**

|                    | MCF-10A CD <sub>1</sub> :CD <sub>p</sub> |      |           |         |                 | MCF-10A CD <sub>1</sub> :CH <sub>2</sub> |      |           |         |                 |
|--------------------|------------------------------------------|------|-----------|---------|-----------------|------------------------------------------|------|-----------|---------|-----------------|
|                    | Sum Sq.                                  | d.f. | Mean Sq.  | F       | Prob>F          | Sum Sq.                                  | d.f. | Mean Sq.  | F       | Prob>F          |
| Insulin            | 0.008009                                 | 2    | 0.0040045 | 0.36443 | 0.69523         | 0.0010429                                | 2    | 0.0005215 | 15.0812 | <b>1.13E-06</b> |
| Methionine         | 0.061128                                 | 1    | 0.061128  | 5.563   | <b>0.019688</b> | 3.46E-06                                 | 1    | 3.46E-06  | 0.10001 | 0.75227         |
| Insulin*Methionine | 0.0031567                                | 2    | 0.0015784 | 0.14364 | 0.86633         | 3.34E-05                                 | 2    | 1.67E-05  | 0.48336 | 0.61771         |
| Error              | 1.5823                                   | 144  | 0.010988  |         |                 | 0.004979                                 | 144  | 3.46E-05  |         |                 |
| Total              | 1.6546                                   | 149  |           |         |                 | 0.0060588                                | 149  |           |         |                 |

**B**

|                    | MDA-MB-231 CD <sub>1</sub> :CD <sub>p</sub> |      |          |        |                 | MDA-MB-231 CD <sub>1</sub> :CH <sub>2</sub> |      |           |         |                 |
|--------------------|---------------------------------------------|------|----------|--------|-----------------|---------------------------------------------|------|-----------|---------|-----------------|
|                    | Sum Sq.                                     | d.f. | Mean Sq. | F      | Prob>F          | Sum Sq.                                     | d.f. | Mean Sq.  | F       | Prob>F          |
| Insulin            | 0.046629                                    | 2    | 0.023315 | 1.9588 | 0.14477         | 0.04666                                     | 2    | 0.0065004 | 16.2293 | <b>4.40E-07</b> |
| Methionine         | 0.25799                                     | 1    | 0.25799  | 21.675 | <b>7.27E-06</b> | 0.0031618                                   | 1    | 0.0090534 | 22.6031 | <b>4.78E-06</b> |
| Insulin*Methionine | 0.038589                                    | 2    | 0.019295 | 1.621  | 0.20128         | 0.0008114                                   | 2    | 0.0013273 | 3.3137  | <b>0.039174</b> |
| Error              | 1.714                                       | 144  | 0.011903 |        |                 | 0.059362                                    | 144  | 0.0004005 |         |                 |
| Total              | 2.0572                                      | 149  |          |        |                 | 0.10999                                     | 149  |           |         |                 |

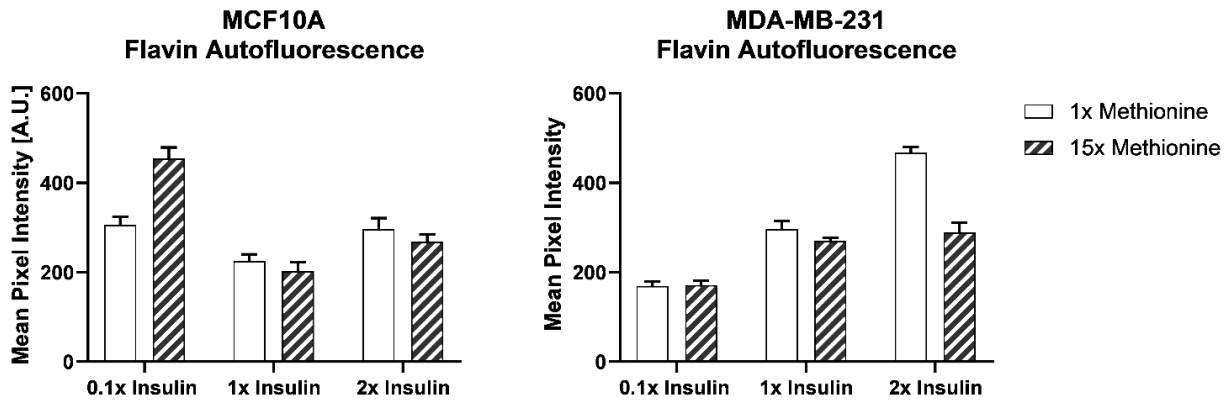

Figure S4. Quantitative summary of flavin autofluorescence from TPF image analysis. Excess methionine generally decreased flavin autofluorescence, whereas higher insulin concentrations generally increased flavin autofluorescence.
